# Supplementary material for: Effectiveness of maternal COVID-19 vaccination varies by gestational timing: results from a claims-based cohort study, 2020–2022
Source: Research Square preprint supplement (doi:10.21203/rs.3.rs-9772693/v1), 2026-06-01
Supplement: Supplementary file 1 [file c4b7b30bcbb720f1a478e635.docx]

**SUPPLEMENARY MATERIAL**

Contents

[Data sources 2](#_Toc229996865)

[Inclusion criteria 3](#_Toc229996866)

[Exposures 3](#_Toc229996867)

[**Table 1S**: Vaccine product codes used to ascertain exposure (vaccination). 4](#_Toc229996868)

[Outcomes 5](#_Toc229996869)

[Covariates 5](#_Toc229996870)

[**Table 2S: Codes used to ascertain covariates** 7](#_Toc229996871)

[**Table 3S**: Influenza vaccine product codes used to identify pre-pregnancy influenza vaccination. 9](#_Toc229996872)

[Study attrition 10](#_Toc229996873)

[Figure 1S: Study attrition 10](#_Toc229996874)

[COVID-19 cases and hospitalizations by gestational age 11](#_Toc229996875)

[Figure 2S: Frequency distributions of COVID-19 cases (left) and hospitalizations (right) by gestational age at diagnosis. 11](#_Toc229996876)

[Covariate balance after IPTW 12](#_Toc229996877)

[Sensitivity analyses 13](#_Toc229996878)

[References 15](#_Toc229996879)

# Data sources

The analyses used the Merative® MarketScan® Research Databases, a family of linked research datasets that combine de-identified patient-level health information for over 263 million enrollees. These include three core data assets: the Merative® MarketScan® Commercial Database, the Merative® MarketScan® Medicare Supplemental Database, and the Merative® MarketScan® Multi-State Medicaid Database. These data assets include patient-level information on medical and pharmaceutical claims, workplace absences, laboratory test results, health risk assessments, hospital discharges, and electronic medical records (EMR). The Commercial Database includes medical and drug data provided by employers and health plans for all covered family members. Medical claims data are linked to outpatient prescription drug claims and person-level enrolment data. The data cover commercially insured individuals and other insured family members. Since this database draws on employer and health plan data, it captures information on workplace immunizations and other workforce measures. The Merative® MarketScan® Multi-state Medicaid Database includes inpatient and outpatient services, prescription drug claims, and eligibility, service, and provider-type data for more than 47 million Medicaid enrollees across multiple states. The databases capture outpatient and inpatient medical care, retail, mail order, and specialty pharmacy prescriptions. Linked claims-lab results data provide information on laboratory test results, including the test performed, the date the test was performed, and the test results. Supplemental Databases: The MarketScan® Explorys® Claims-EMR Data Set (CED) integrates claims data from the Commercial and Medicaid Databases with data from patients with an IBM® Explorys® EMR record. The CED data asset allows comparison and verification of clinical records, including laboratory testing results and immunization data, with medical claims records.

# Inclusion criteria

Participants were eligible for inclusion in the cohort if they (1) had a pregnancy overlapping the study period, (2) had prescription benefits coverage (to ensure complete capture of immunization data), and (3) were continuously enrolled in a participating healthcare plan from 12 months prior to estimated LMP through to the end of pregnancy event. Participants were required to be continuously enrolled in their health plan to ensure adequate ascertainment of exposures and outcomes. Continuous enrolment (CE) was defined as women enrolled in their health plan at least 12 months prior to their estimated last menstrual period (LMP) through to the end of pregnancy event, allowing for a <45-day gap in coverage. Women not meeting this CE criteria were excluded.

# Exposures

We categorised vaccination exposure by gestational age into: first trimester (0–13 weeks), early second trimester (14–20 weeks), late second trimester (21–27 weeks), and third trimester (28–42 weeks), as well as a category for ≥2 doses during pregnancy. This categorisation was designed to reflect both biologically meaningful stages of pregnancy and real-world antenatal care patterns. In particular, the division of the second trimester into early (14–20 weeks) and late (21–27 weeks) captures important transitions in fetal development, clinical care, and vaccine delivery timing. Early second trimester (14–20 weeks) typically occurs prior to routine mid-pregnancy milestones such as the detailed anatomy ultrasound (~18–20 weeks) and viability thresholds (~20–24 weeks), and corresponds to a period when vaccine uptake is generally lower and clinical decision-making may still be influenced by first trimester considerations. Late second trimester (21–27 weeks) represents a distinct antenatal phase, characterised by more routine engagement with maternity care and alignment with the timing of recommended maternal immunisations. By separating the second trimester into these intervals, we aimed to better capture variation in clinical practice, biological context, and vaccine recommendation windows, rather than assuming a homogeneous exposure period.

Evidence of vaccine administration was derived by extracting the dates of service and products used for all vaccine administrations captured from outpatient services, hospital inpatient and outpatient drug records, and claims from employers, insurance companies, mail order prescriptions, and specialty pharmacies.

Medical and pharmacy claims data, employer data, and EMR data were used to identify COVID-19, and influenza vaccination records. We used Current Procedural Terminology (CPT®) and National Drug Code (NDC) to identify vaccine administration, including the date of service (Table 1S).

## **Table 1S**: Vaccine product codes used to ascertain exposure (vaccination).

| **Vaccine** | **Current Procedural Terminology (CPT ®) and National Drug Codes (NDC)** |
| --- | --- |
| **COVID-19** |  |
| Pfizer-BioNTech® BNT162b2 (Comirnaty) | "91300","91305","91307","91308","91312","91315","91317","91320","91319","91318","5926710001","59267100001","59267100002","5926710002","59267100003","5926710003","5926710251","59267102501","59267102503","59267102502","59267102504","59267102504","5926710551","59267105501","5926710253","59267105502","59267105504","5926710554","5926700781","59267007801","5926700784","59267007804","5926714041","59267140401","59267030402","59267140402","5926703042","5926714042","5926710254","5926703041","59267030401","5926705651","59267056501","59267056502","5926705652","5926706091","59267060901","59267060902","5926706092","59267431502","59267431501","5926743152","5926743151","59267433102","59267433101","5926743312","5926743311","0069202510","00069202510","00069202510","00069202525","0069202525","00069237710","0069202501","00069239210","0006920251","00069202501","00069236210","00069237701","00069239201","00069236201","0069237710","0069239210","0069236210","0069237701","0069239201","0069236201"  "0001A","0051A","0071A","0002A","0052A","0072A","0003A","0053A","0073A", "0004A","0054A","0074A", "0124A","0154A" |
| Moderna® mRNA-1273 (Spikevax) | "91301","91306","91309","91311","91313","91314","91316","91321","91322","8077727310","80777027310","8077710011","8011101001","8077701001","80777027399","80777027398","80777010099","80777027310","80777027315","80777010011","8077727399","8077727398","8077710099","8077727315","8077710011","8077727505","80777027505","80777027599","80777027799","80777027705","8077727599","8077727799","8077727705","8077727905","80777027905","80777027999","8077027905","8077727999","8077727905","807772828205","80777028205","80777028299","80777028205","8077728299","8077728205","8077728205","80777028205","80777028299","80777028399","8077728302","80777028302","8077728399","80777028792","80777028707","8077728792","8077728707","80777010295","80777010293","80777010296","80777010204","80777010201","8077710295","8077710293","8077710296","8077710204","8077710201"  "0011A","0091A","0111A","0012A","0092A","0112A","0013A","0093A","0113A","0064A","0094A","0134A","0144A","0164A" |
| Janssen® Ad26.COV2.S | "91303","5967658005","59676058005","59676058015","59676058005","5967658015","5967658005  "0031A", "0034A" |
| COVID-19 vaccine brand unknown | "90480" |

# Outcomes

Our first outcome of interest was medically-attended COVID-19 during pregnancy. These were identified by extracting claims from outpatient services, hospital inpatient and outpatient records. We used the following International Classification of Disease, Tenth Revision, Clinical Modification (ICD-10-CM) codes to ascertain outcomes: Emergency use of U071 (COVID-19, virus identified); Emergency use of U072 (COVID-19, virus not identified); B972, Coronavirus as the cause of disease classified elsewhere; B342, Coronavirus infection, unspecified site; J1281, Pneumonia due to SARS-associated coronavirus; J1282, Pneumonia due to coronavirus disease 2019. Our second outcome of interest was COVID-19 hospitalization during pregnancy, defined as any inpatient admission among women admitted with a COVID-19 diagnosis code outlined above.

# Covariates

Stabilized inverse probability treatment weights (IPTW) were used to standardize estimates for measured confounders. IPTW was calculated as the conditional probability of being exposed given the vector of observed covariates using a multinomial logistic regression model.

Covariates were identified using International Classification of Diseases, Tenth Revision, Clinical Modification (ICD-10-CM), ICD-10 Procedure Coding System (ICD-10-PCS) and Current Procedural Terminology (CPT) as shown in Table 2S. This included maternal age, insurance type (privately or publicly insured), smoking status (a composite of clinically-coded tobacco use complicating pregnancy, childbirth and the puerperium or clinically-coded history of smoking in the 365 days prior to LMP); drug use complicating pregnancy, childbirth and the puerperium, underlying cardiovascular disease (acute myocardial infarction, heart failure, conditions affecting the heart valve(s), hypertension, cardiomyopathy or sickle cell disease), respiratory disease (asthma, pulmonary fibrosis, tuberculosis, or cystic fibrosis), history (in the 365-days prior to pregnancy), immunocompromising condition(s) (organ transplant or other immunocompromising conditions), disability, history of preterm birth, influenza vaccine prior to pregnancy, COVID-19 vaccine prior to pregnancy, and COVID-19 diagnosis prior to pregnancy. We used Current Procedural Terminology (CPT®) National Drug Codes (NDC) to identify influenza vaccines administered in the 365 days prior to LMP, including date of service (Table 3S) For COVID-19 vaccines administered in the 365 days prior to pregnancy, we used the same code set as described above (Exposure).

Additional direct adjustments were made for calendar time of pregnancy (year and quarter of LMP) to account for secular trends, and weekly nationally-reported COVID-19 case counts (log-transformed) to capture variation in force of infection. Data were sourced from Our World in Data, restricted to cases (confirmed or probably) reported in the US from 1 January 2020 through to 15 September 2022, 14 days period to the administrative end of follow up.(1)

## **Table 2S: Codes used to ascertain covariates**

|  | **ICD-10-CM; ICD-10-PSC; CPT codes** |
| --- | --- |
| **Smoking status** |  |
| Tobacco use complicating pregnancy, childbirth and the puerperium | "O99330","O99331","O99332","O99333","O99334","O99335" |
| Smoking | "F17210","F17213","F17218","F17219","F17220",  "F17223","F17228","F17229","F17290","F17293",  "F17298","F17299","T65211A","T65211D","T65211S",  "T65212A","T65212D","T65212S","T65213A","T65213D",  "T65213S","T65214A","T65214D","T65214S","Z716",  "Z720","Z87891" |
| **Drug complicating pregnancy, childbirth and the puerperium** | "O99320","O99321","O99322","O99323","O99324","O99325" |
| **History of preterm birth** | "O0921","O09211","O09212","O09213","O09219","Z8751" |
| **Respiratory disease** |  |
| Asthma | "J45","J452","J4520","J4521","J4522","J453","J4530","J4531","J4532", "J454","J4540","J4541","J4542","J455","J4550","J4551","J4552","J459","J4590","J45901","J45902","J45909","J45990","J45991","J45998","R96" |
| Pulmonary fibrosis | "J8410","J84112","I2723" |
| Cystic fibrosis | "E84","E840","841","E8411","E8419",  "E848","E849" |
| Tuberculosis | "A15","A150","A154","A155","A156","A157","A158","A159","A17","A170","A171","A178","A1781","A1782","A1783","A1789","A179","A18","A180","A1801","A1802","A1803","A1809","A181","A1810","A1811","A1812","A1813","A1814","A1815","A1816","A1817","A1818","A182","A183","A1831","A1832","A1839","A184","A185","A1850","A1851","A1852","A1853","A1854","A1859","A186","A187","A188","A1881","A1882","A1883","A1884","A1885","A1889","A19","A190","A191","A192","A198","A199","O980","O9801","O98011","O98012","O98013","O98019","O9802","O9803" |
| **Cardiovascular disease** | |
| Cardiomyopathy | "I42","I420","I421","I422","I423",  "I424","I425","I426","I427","I428",  "I429","I43" |
| Heart failure | "I50","I501","I502","I5020","I5021","I5022","I5023","I503",  "I5030","I5031","I5032","I5033","I504","I5040","I5041",  "I5042","I5043","I508","I5081","I50810","I50811","I50812",  "I50813","I50814","I5082","I5083","I5084","I5089","I509" |
| Acute myocardial infarction | "I21","I210","I2101","I2102","I2109","I211","I2111","I2119","I212",  "I2121","I2129","I213","I214","I219","I21A","I21A1","I21A9","I22",  "I220","I221","I222","I228","I229","I25","I252" |
| Conditions affecting the heart valve | "A5203","I05","I050","I051","I052","I058","I059","I06","I060",  "I061","I062","I068","I069","I07","I070","I071","I072","I078",  "I079","I08","I080","I081","I082","I083","I088","I089","I091",  "I0989","I270","I272","I34","I340","I341","I342","I348","I349",  "I35","I350","I351","I352","I358","I359","I36","I360","I361",  "I362","I368","I369","I37","I370","I371","I372","I378","I379",  "I38","I39","Q230","Q231","Q232","Q233","Z952","Z953","Z954" |
| Sickle cell disease | "D57","D570","D5700","D5701","D5702","D571","D572","D5720",  "D5721","D57211","D57212","D57219","D574","D5740","D5741",  "D57411","D57412","D57419","D578","D5780","D5781","D57811",  "D57812","D57819","D56","D560","D561","D562","D563","D564",  "D565","D568","D569" |
| Hypertension | "I10","I15","I150","I151","I152","I158","I159","I16","I160",  "I161","I169","I674","O10","O100","O1001","O10011","O10012",  "O10013","O10019","O1002","O1003","O109","O1091","O10911",  "O10912","O10913","O10919","O1092","O1093" |
| **Immunocompromising condition** | |
| Organ transplant | "Z482","Z4821","Z4822","Z4823","Z4824","Z4828","Z48280",  "Z48288","Z4829","Z48298","Z940","Z941","Z942","Z943",  "Z944","Z945","Z946","Z947","Z948","Z9482","Z9483",  "Z9489","Z949" |
| Other immunocompromising conditions | "B20","O987","O9871","O98711","O98712","O98713",  "O98719","O9872","O9873","D80","D800","D801","D802",  "D803","D804","D805","D806","D807","D808","D809",  "D81","D810","D811","D812","D8130","D8131","D8132",  "D8139","D814","D815","D816","D817","D81810",  "D81818","D81819","D8182","D8189","D819","D82",  "D820","D821","D822","D823","D824","D828","D829",  "D83","D830","D831","D832","D838","D839","D84",  "D840","D841","D8481","D84821","D84822","D8489",  "D849","D89","D890","D891","D892","D893","D8940",  "D8941","D8942","D8943","D8944","D8949","D89810",  "D89811","D89812","D89813","D8982","D89831","D89832",  "D89833","D89834","D89835","D89839","D8989","D899",  "D47OZ1","T451X1","T451X1A","T451X1","T451X1s","Z21",  "Z510","Z511","Z5111","Z5112","Z795","Z7951","Z7952",  "Z48290","Z9481","Z9484" |
| **Disability** | "F70","F71","F72","F73","F78","F78A","F78A1","F78A9","F79",  "F80","F800","F801","F802","F804","F808","F8081","F8082",  "F8089","F809","F81","F810","F812","F818","F8181","F8189",  "F819","F82","F84","F840","F842","F843","F845","F848",  "F849","F88","F89","F90","F900","F901","F902","F908",  "F909","G80","G800","G801","G802","G803","G804","G808",  "G809","G81","G810","G8100","G8101","G8102","G8103","G8104",  "G811","G8110","G8111","G8112","G8113","G8114","G819",  "G8190","G8191","G8192","G8193","G8194","G82","G822",  "G8220","G8221","G8222","G825","G8250","G8251","G8252",  "G8253","G8254","G83","G830","G831","G8310","G8311",  "G8312","G8313","G8314","G832","G8320","G8321","G8322",  "G8323","G8324","G833","G8330","G8331","G8332","G8333",  "G8334","G834","G835","G838","G8381","G8382","G8383",  "G8384","G8389","G839" |

## **Table 3S**: Influenza vaccine product codes used to identify pre-pregnancy influenza vaccination.

| **Vaccine** | **Current Procedural Terminology (CPT ®) and National Drug Codes (NDC)** |
| --- | --- |
| **Influenza** |  |
| Quadrivalent LAIV4 | "90672","66019030910","66019031001","90672CG" |
| Trivalent LAIV3 | "90660" |
| Cell-based quadrivalent ccIIV4 | "90756","70461042310","70461042311","90674","70461032303","70461032304","70461032203","70461042210","90674CG","90756CG" |
| Quadrivalent IIV4 | "90630","90686","Q2036","33332032203","33332032304","58160090952","58160090941","19515081452","19515081441","49281042350","49281042388","90687","33332042310","33332042311","90688","49281063915","49281063978","19515080852","58160089052","49281042250","49281042210","90687","49281063715","90686CG","90688CG","Q2037","Q2035","90685","90689" |
| Trivalent IIV3 | "90653","90654","90655","90656","90657","90658","Q2034" |
| High dose quadrivalent hdIIV4 | "90662","49281012365","49281012388","90662CG","Q2038" |
| Trivalent recombinant RIV3 | "90673" |
| Quadrivalent recombinant IRIV4 | "90682","49281072310","49281072388","90682CG" |
| Adjuvanted quadrivalent aIIV4 | "90694","70461012303","70461012304","90694CG" |
| Adjuvanted trivalent aIIV3 | "90653" |
| Unknown | "Q2039","G0008" |

# Study attrition

## Figure 1S: Study attrition


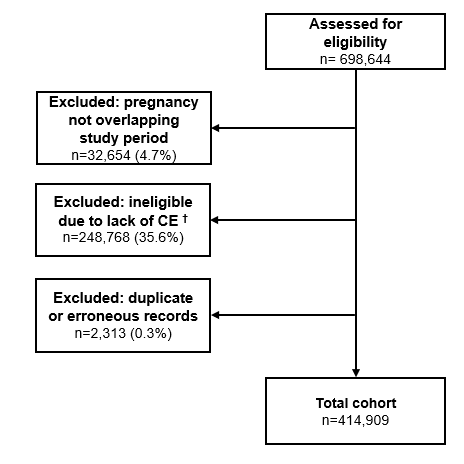


NOTES: CE=continuous enrolment; † CE was defined as women enrolled on or before their estimated last menstrual period (LMP) through to the end of pregnancy event, and without ≥45-day continuous break in insurance coverage; women not meeting this CE criteria were excluded. A small number of duplicate or implausible pregnancy records were excluded, including multiple‑gestation records and records with estimated LMPs inconsistent with chronology of a subsequent pregnancy (e.g. inter‑record LMP differences <30 days).

# COVID-19 cases and hospitalizations by gestational age

## Figure 2S: Frequency distributions of COVID-19 cases (left) and hospitalizations (right) by gestational age at diagnosis.


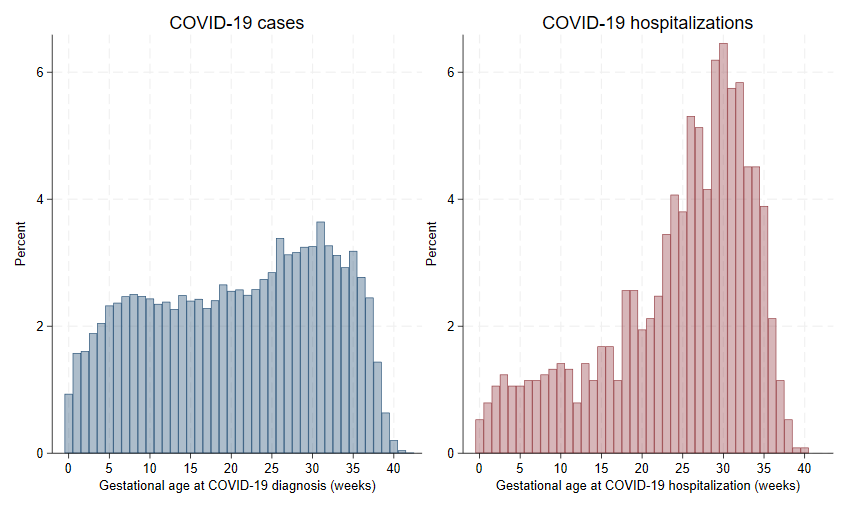


# Covariate balance after IPTW

Standardized mean differences (SMDs) were calculated for each exposure level relative to the unvaccinated reference group (level 0). As this results in multiple SMDs per covariate (one for each exposure level vs. reference), we summarized covariate balance using the maximum absolute SMD across these pairwise comparisons, representing the greatest imbalance observed across exposure levels. Thus, the maximum SMD reflects the largest deviation from the reference observed among the exposure groups

**Table 4S**: Maximum standardized mean differences across exposure categories assessing covariate balance, before and after IPTW

| **Covariates** | **Maximum mean in treated** | **Mean in untreated** | **Maximum SMD** |
| --- | --- | --- | --- |
| Maternal age * | 30.830 | 30.060 | 0.141 |
| Insurance provider type | 0.450 | 0.460 | -0.012 |
| Smoking history and/or smoking complicating pregnancy | 0.170 | 0.160 | 0.009 |
| Drug use complicating pregnancy | 0.060 | 0.060 | 0.005 |
| Cardiovascular complications prior to pregnancy | 0.090 | 0.080 | 0.034 |
| Respiratory complications prior to pregnancy | 0.210 | 0.200 | 0.020 |
| Immunocompromising conditions prior to pregnancy | 0.020 | 0.010 | 0.023 |
| Disability | 0.050 | 0.040 | 0.029 |
| Past history of pregnancy(ies) ending with preterm birth | 0.060 | 0.050 | 0.028 |
| Pre-pregnancy COVID-19 diagnoses | 0.070 | 0.060 | 0.064 |
| Influenza vaccination prior to pregnancy | 0.120 | 0.100 | 0.066 |
| COVID-19 vaccination prior to pregnancy | 0.140 | 0.100 | 0.088 |

NOTES: * maternal age remained unbalanced after applying IPTW and was additionally included as a direct adjustments in the outcome models, consistent with a doubly robust analytic approach.

# Sensitivity analyses

To assess the robustness of vaccine effectiveness (VE) estimates and to evaluate potential outcome ascertainment bias related to timing of vaccination during pregnancy, we conducted a sensitivity analysis in which follow‑up was censored five days prior to the end of pregnancy. This approach aimed to exclude COVID-19 cases detected through routine testing or screening associated with admission for delivery, which may identify asymptomatic or mildly symptomatic infections and is unlikely to differ by vaccination status.

Results of this analysis were generally consistent with the primary findings for VE against COVID-19 hospitalization. For our analysis of VE against COVID-19 cases, the modest attenuation in VE following third trimester vaccination was no longer evident, supporting the interpretation that this pattern in the primary analysis likely reflects ascertainment bias rather than reduced vaccine effectiveness (Table 5s).

**Table 5S: Sensitivity analysis (follow‑up censored five days prior to end of pregnancy), showing hazard ratios, vaccine effectiveness estimates, and 95% confidence intervals (reference: unvaccinated during pregnancy) against maternal (A) COVID‑19 cases and (B) COVID-19 hospitalization by dose and trimester of vaccination during pregnancy.**

|  |  |  |  |  | **Unadjusted** | **Adjusted†** | | |
| --- | --- | --- | --- | --- | --- | --- | --- | --- |
| **Exposure status*** | **Subjects** | **Outcomes** | **Time at risk (days)** | **Incidence (per 100,000 person days)** | **HR (LCI, UCI)** | **HR (LCI, UCI)** | **VE (LCI, UCI)** |
| **(A) COVID-19 cases** | 414,909 | 37,953 | 91,690,314 | 41.4 |  |  |  |
| Unvaccinated (reference) | 414,909 | 35,551 | 87,298,518 | 40.7 | Ref | Ref | Ref |
| Vaccinated first trimester | 14,225 | 1,304 | 2,304,751 | 56.6 | 1.3 (1.2, 1.3) | 0.9 (0.8, 1.0) | 9.9 (3.5, 15.9) |
| Vaccinated early second trimester | 8,946 | 549 | 1,018,640 | 53.9 | 1.0 (1.0, 1.1) | 0.7 (0.7, 0.8) | 26.9 (18.6, 34.4) |
| Vaccinated late second trimester | 8,868 | 331 | 622,993 | 53.1 | 0.9 (0.8, 1.0) | 0.7 (0.6, 0.8) | 34.8 (24.9, 43.3) |
| Vaccinated third trimester | 8,627 | 123 | 244,973 | 50.2 | 0.8 (0.7, 1.0) | 0.6 (0.5, 0.8) | 35.3 (18.8, 48.4) |
| Vaccinated ≥2 during pregnancy | 2,849 | 95 | 200,439 | 47.4 | 0.9 (0.7, 1.1) | 0.6 (0.5, 0.7) | 42.4 (27.4, 54.3) |
| **(B) COVID-19 hospitalizations** | 414,909 | 1,082 | 95,547,475 | 1.1 |  |  |  |
| Unvaccinated (reference) | 414,909 | 1,046 | 90,879,409 | 1.2 | Ref | Ref | Ref |
| Vaccinated first trimester | 14,464 | 18 | 2,441,121 | 0.7 | 0.5 (0.3, 0.8) | 0.6 (0.4, 1.1) | 38.5 (-5.5, 64.1) |
| Vaccinated early second trimester | 9,269 | 11 | 1,082,236 | 1.0 | 0.5 (0.3, 1.0) | 0.7 (0.4, 1.4) | 29.4 (-40.5, 64.5) |
| Vaccinated late second trimester | 9,330 | 5 | 666,439 | 0.8 | 0.3 (0.1, 0.8) | 0.3 (0.1, 0.9) | 71.7 (8.8, 91.2) |
| Vaccinated third trimester | 9,178 | 1 | 261,817 | 0.4 | 0.2 (0.0, 1.5) | 0.3 (0.0, 1.9) | 72.5 (-93.2, 96.1) |
| Vaccinated ≥2 during pregnancy | 3,021 | 1 | 216,453 | 0.5 | 0.3 (0.0, 1.8) | nc | 80.3 (-40.0, 97.2) |

NOTES: * Exposure status definitions: Unvaccinated = unvaccinated during the current pregnancy; first trimester = 0-13 weeks; early second trimester = 14-20 weeks; late second trimester = 21-27 weeks; third trimester = 28-42 weeks; Vaccinated with ≥2 doses during pregnancy = two or more doses of COVID-19 vaccine administrated at any time during the current pregnancy. Ref=Reference; HR=Hazard ratio; VE=Vaccine effectiveness; LCI=Lower confidence interval; UCI=Upper confidence interval. † Inverse probability treatment weights (IPTW) were used to standardize estimates for measured confounders: maternal age, insurance provider type, smoking status, drug use during pregnancy, history of cardiovascular disease, respiratory disease, immunocompromising condition, disability, history of preterm birth, COVID-19 diagnosis prior to pregnancy, influenza vaccine prior to pregnancy, and COVID-19 vaccine prior to pregnancy. Additional direct adjustments were made for calendar time (quarter of the last menstrual period) and the log of weekly, nationally-reported COVID-19 cases in the US.

# References

1. World Health Organization. Weekly confirmed COVID-19 cases 2026 [06/01/2026]. Available from: <https://ourworldindata.org/grapher/weekly-covid-cases>.
